# Supplementary material for: Prevalence, Incidence, and Associated Factors of Possible Sarcopenia in Community-Dwelling Chinese Older Adults: A Population-Based Longitudinal Study
Source: PubMed Central journal article supplement (PMC8784542; doi:10.3389/fmed.2021.769708), 2022-01-10
Supplement: Data_Sheet_4.pdf [file Data_Sheet_4.pdf]

Supplementary materials

Supplementary Table 1 Risk factors of the prevalence and incidence of possible sarcopenia (including those with cognitive, psychiatric disorders or cancer)

| Risk factors                | Logistics regression model<br>(n=1943) |        |       |         | Proportional hazard model<br>(n=695) |        |       |         |
|-----------------------------|----------------------------------------|--------|-------|---------|--------------------------------------|--------|-------|---------|
|                             | Adjusted<br>OR                         | 95% CI |       | P-value | Adjusted<br>HR                       | 95% CI |       | P-value |
|                             |                                        | Lower  | Upper |         |                                      | Lower  | Upper |         |
| <b>Gender</b>               |                                        |        |       | 0.219   |                                      |        |       | 0.623   |
| Female                      | 1                                      |        |       |         | 1                                    |        |       |         |
| Male                        | 0.816                                  | 0.590  | 1.129 |         | 1.113                                | 0.726  | 1.706 |         |
| <b>Age</b>                  |                                        |        |       | <0.001  |                                      |        |       | <0.001  |
| 60-70                       | 1                                      |        |       |         | 1                                    |        |       |         |
| 70-80                       | <b>1.746</b>                           | 1.327  | 2.298 |         | <b>1.586</b>                         | 1.121  | 2.246 |         |
| 80 and above                | <b>3.725</b>                           | 1.860  | 7.462 |         | <b>4.185</b>                         | 1.777  | 9.858 |         |
| <b>Education</b>            |                                        |        |       | <0.001  |                                      |        |       | 0.465   |
| Illiteracy                  | 1                                      |        |       |         | 1                                    |        |       |         |
| Primary school              | <b>0.604</b>                           | 0.468  | 0.780 |         | 0.830                                | 0.600  | 1.147 |         |
| Secondary school            | <b>0.554</b>                           | 0.375  | 0.818 |         | 0.760                                | 0.440  | 1.313 |         |
| High school and above       | <b>0.280</b>                           | 0.162  | 0.483 |         | 0.607                                | 0.300  | 1.231 |         |
| <b>Marriage</b>             |                                        |        |       | 0.348   |                                      |        |       | 0.499   |
| Married                     | 1                                      |        |       |         | 1                                    |        |       |         |
| Single, divorced or widowed | 1.145                                  | 0.863  | 1.520 |         | 0.859                                | 0.553  | 1.334 |         |
| <b>Residence</b>            |                                        |        |       | 0.634   |                                      |        |       | 0.151   |
| Urban                       | 1                                      |        |       |         | 1                                    |        |       |         |
| Rural                       | 1.061                                  | 0.830  | 1.357 |         | 1.267                                | 0.917  | 1.750 |         |
| <b>Physical activity</b>    |                                        |        |       | <0.001  |                                      |        |       | 0.607   |
| Inactive                    | 1                                      |        |       |         | 1                                    |        |       |         |
| Moderate                    | <b>0.607</b>                           | 0.427  | 0.864 |         | 1.215                                | 0.751  | 1.964 |         |
| High                        | <b>0.466</b>                           | 0.351  | 0.618 |         | 1.011                                | 0.680  | 1.504 |         |
| <b>Smoking status</b>       |                                        |        |       | 0.667   |                                      |        |       | 0.862   |
| Never                       | 1                                      |        |       |         | 1                                    |        |       |         |
| Ever but quit               | 1.111                                  | 0.726  | 1.702 |         | 1.066                                | 0.578  | 1.964 |         |
| Current smoke               | 1.161                                  | 0.837  | 1.611 |         | 0.933                                | 0.587  | 1.482 |         |
| <b>Drinking status</b>      |                                        |        |       | 0.434   |                                      |        |       | 0.501   |
| Never                       | 1                                      |        |       |         | 1                                    |        |       |         |
| Ever but quit               | 0.992                                  | 0.688  | 1.432 |         | 0.806                                | 0.503  | 1.289 |         |
| Current drink               | 0.833                                  | 0.622  | 1.114 |         | 0.819                                | 0.566  | 1.184 |         |
| <b>Depression</b>           |                                        |        |       | <0.001  |                                      |        |       | 0.036   |
| No                          | 1                                      |        |       |         | 1                                    |        |       |         |

|                       |              |       |       |       |              |       |       |       |
|-----------------------|--------------|-------|-------|-------|--------------|-------|-------|-------|
| Yes                   | <b>1.696</b> | 1.336 | 2.155 |       | <b>1.381</b> | 1.022 | 1.866 |       |
| <b>BMI</b>            |              |       |       | 0.966 |              |       |       | 0.251 |
| Underweight           | 0.987        | 0.660 | 1.478 |       | 1.537        | 1.006 | 2.348 |       |
| Normal                | 1            |       |       |       | 1            |       |       |       |
| Overweight            | 0.960        | 0.707 | 1.304 |       | 1.047        | 0.722 | 1.519 |       |
| Obesity               | 0.933        | 0.712 | 1.224 |       | 1.105        | 0.757 | 1.615 |       |
| <b>Multimorbidity</b> |              |       |       | 0.292 |              |       |       | 0.261 |
| No                    | 1            |       |       |       | 1            |       |       |       |
| Yes                   | 1.131        | 0.900 | 1.421 |       | 1.186        | 0.881 | 1.598 |       |

---

**Supplementary Table 2 Risk factors of the prevalence and incidence of possible sarcopenia using imputed dataset**

| Risk factors                | Logistics regression model<br>(n=4866) |        |       |         | Proportional hazard model<br>(n=1754) |        |       |         |
|-----------------------------|----------------------------------------|--------|-------|---------|---------------------------------------|--------|-------|---------|
|                             | Adjusted<br>OR                         | 95% CI |       | P-value | Adjusted<br>HR                        | 95% CI |       | P-value |
|                             |                                        | Lower  | Upper |         |                                       | Lower  | Upper |         |
| <b>Gender</b>               |                                        |        |       | 0.467   |                                       |        |       | 0.047   |
| Female                      | 1                                      |        |       |         | 1                                     |        |       |         |
| Male                        | 1.086                                  | 0.869  | 1.356 |         | <b>1.303</b>                          | 1.003  | 1.691 |         |
| <b>Age</b>                  |                                        |        |       | <0.001  |                                       |        |       | <0.001  |
| 60-70                       | 1                                      |        |       |         | 1                                     |        |       |         |
| 70-80                       | <b>2.133</b>                           | 1.754  | 2.593 |         | <b>1.808</b>                          | 1.433  | 2.282 |         |
| 80 and above                | <b>4.457</b>                           | 2.838  | 6.998 |         | <b>3.712</b>                          | 2.148  | 6.414 |         |
| <b>Education</b>            |                                        |        |       | <0.001  |                                       |        |       | 0.002   |
| Illiteracy                  | 1                                      |        |       |         | 1                                     |        |       |         |
| Primary school              | <b>0.663</b>                           | 0.556  | 0.789 |         | <b>0.719</b>                          | 0.579  | 0.892 |         |
| Secondary school            | <b>0.527</b>                           | 0.403  | 0.687 |         | <b>0.585</b>                          | 0.410  | 0.837 |         |
| High school and above       | <b>0.245</b>                           | 0.166  | 0.361 |         | <b>0.520</b>                          | 0.310  | 0.871 |         |
| <b>Marriage</b>             |                                        |        |       | 0.273   |                                       |        |       | 0.127   |
| Married                     | 1                                      |        |       |         | 1                                     |        |       |         |
| Single, divorced or widowed | 1.113                                  | 0.919  | 1.349 |         | 1.229                                 | 0.943  | 1.601 |         |
| <b>Residence</b>            |                                        |        |       | 0.073   |                                       |        |       | 0.034   |
| Urban                       | 1                                      |        |       |         | 1                                     |        |       |         |
| Rural                       | 1.173                                  | 0.985  | 1.397 |         | <b>1.279</b>                          | 1.018  | 1.607 |         |
| <b>Physical activity</b>    |                                        |        |       | <0.001  |                                       |        |       | 0.806   |
| Inactive                    | 1                                      |        |       |         | 1                                     |        |       |         |
| Moderate                    | 0.806                                  | 0.584  | 1.111 |         | 1.081                                 | 0.677  | 1.725 |         |
| High                        | <b>0.576</b>                           | 0.424  | 0.781 |         | 0.956                                 | 0.630  | 1.451 |         |
| <b>Smoking status</b>       |                                        |        |       | 0.348   |                                       |        |       | 0.102   |
| Never                       | 1                                      |        |       |         | 1                                     |        |       |         |
| Ever but quit               | 0.846                                  | 0.602  | 1.189 |         | 0.799                                 | 0.564  | 1.132 |         |
| Current smoke               | 0.853                                  | 0.683  | 1.065 |         | 0.757                                 | 0.584  | 0.981 |         |
| <b>Drinking status</b>      |                                        |        |       | 0.008   |                                       |        |       | 0.481   |
| Never                       | 1                                      |        |       |         | 1                                     |        |       |         |
| Ever but quit               | 1.018                                  | 0.804  | 1.288 |         | 0.938                                 | 0.691  | 1.274 |         |
| Current drink               | <b>0.739</b>                           | 0.604  | 0.904 |         | 0.867                                 | 0.687  | 1.094 |         |
| <b>Depression</b>           |                                        |        |       | <0.001  |                                       |        |       | 0.043   |
| No                          | 1                                      |        |       |         | 1                                     |        |       |         |
| Yes                         | <b>1.550</b>                           | 1.296  | 1.855 |         | <b>1.278</b>                          | 1.007  | 1.622 |         |

|                       |       |       |       |       |       |       |       |       |
|-----------------------|-------|-------|-------|-------|-------|-------|-------|-------|
| <b>BMI</b>            |       |       |       | 0.236 |       |       |       | 0.091 |
| Underweight           | 1.196 | 0.925 | 1.547 |       | 1.373 | 1.027 | 1.835 |       |
| Normal                | 1     |       |       |       | 1     |       |       |       |
| Overweight            | 0.879 | 0.721 | 1.072 |       | 0.895 | 0.700 | 1.044 |       |
| Obesity               | 0.918 | 0.706 | 1.364 |       | 1.087 | 0.748 | 1.578 |       |
| <b>Multimorbidity</b> |       |       |       | 0.372 |       |       |       | 0.165 |
| No                    | 1     |       |       |       | 1     |       |       |       |
| Yes                   | 1.074 | 0.917 | 1.260 |       | 1.149 | 0.945 | 1.398 |       |

---
